# Supplementary material for: An improved preparation method for a CuO/CeO2-coated monolith for the CO–PrOx reaction
Source: PubMed Central journal article supplement (PMC10250403; doi:10.1038/s41598-023-36423-7), 2023-06-08
Supplement: 41598_2023_36423_MOESM2_ESM.pdf [file 41598_2023_36423_MOESM2_ESM.pdf]

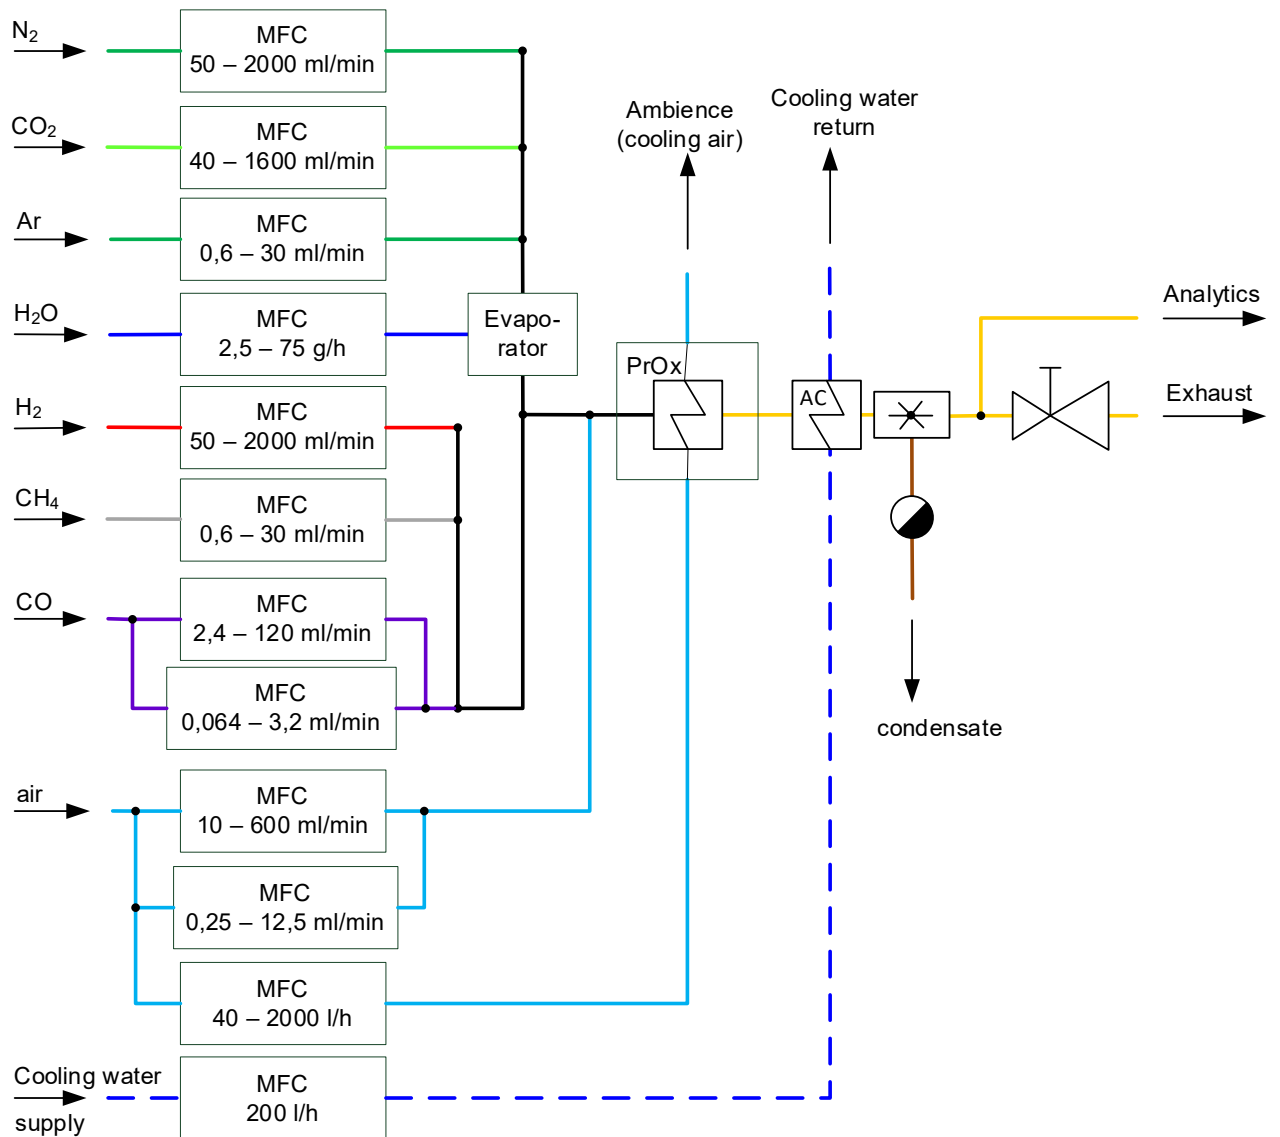

Figure S11. Simplified block diagram of the test rig

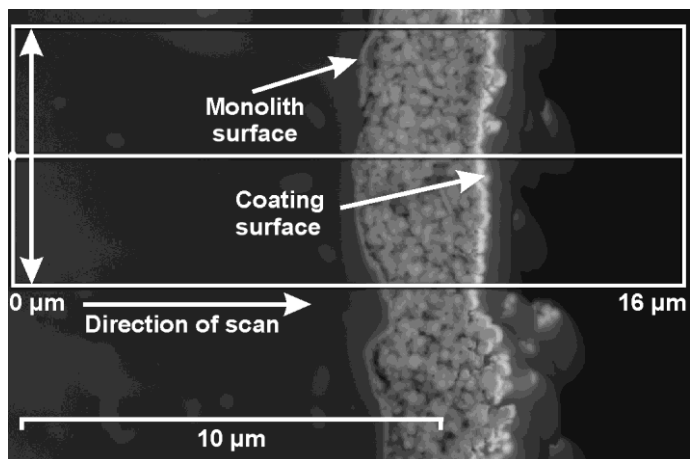

Figure S12. Overview image of the EDX line scan

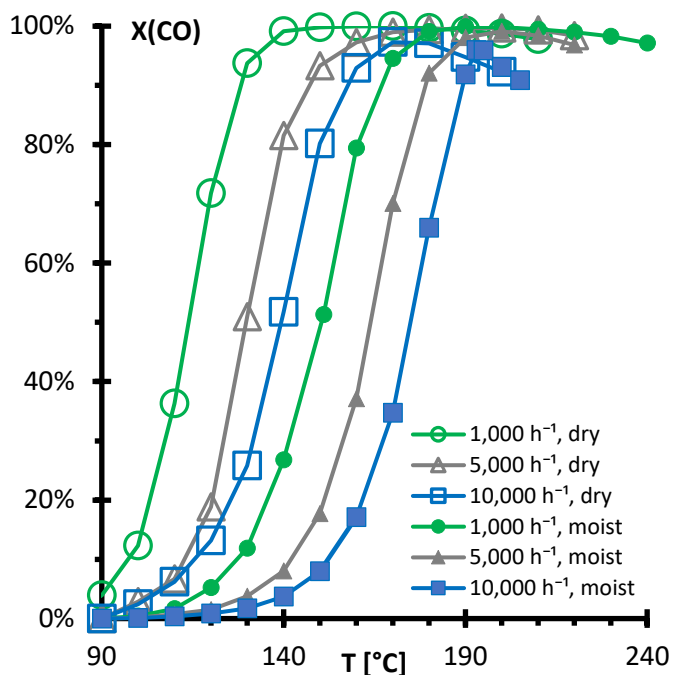

Figure SI3. CO conversion graphs, dry fuel gas (FG1) & moist fuel gas (FG2) with Monolith #2 (CuO/CeO<sub>2</sub>), all  $\lambda = 2.5$ , varying GHSV.

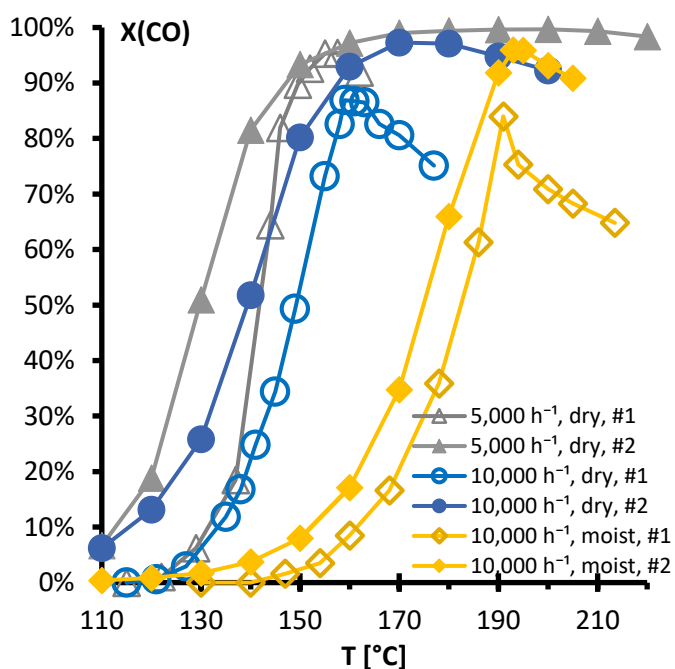

Figure SI4. CO conversion graphs, comparing single coated monolith #1 and double coated monolith #2 (CuO/CeO<sub>2</sub>), all  $\lambda = 2.5$ , varying GHSV.

Table SL1. Monoliths overview

| composition                                       | Washcoat carrier                      | preparation/<br>coating method                          | monolith   |                |                                                            |                                                |        |        |                      | Feed [mol.%]   |                 |                  |             |                |                |        | GHSV [h <sup>-1</sup> ] | λ               | T [°C]   | X(CO) [%] | S(CO) [%] | X(O <sub>2</sub> ) [%] | Y(CO) [%]                                                                       | remark | ref. |     |
|---------------------------------------------------|---------------------------------------|---------------------------------------------------------|------------|----------------|------------------------------------------------------------|------------------------------------------------|--------|--------|----------------------|----------------|-----------------|------------------|-------------|----------------|----------------|--------|-------------------------|-----------------|----------|-----------|-----------|------------------------|---------------------------------------------------------------------------------|--------|------|-----|
|                                                   |                                       |                                                         | layer [μm] | pore size [nm] | coating quantity [mg/cm <sup>3</sup> ]                     | support                                        | l [mm] | D [mm] | V [cm <sup>3</sup> ] | H <sub>2</sub> | CO <sub>2</sub> | H <sub>2</sub> O | CO          | N <sub>2</sub> | O <sub>2</sub> |        |                         |                 |          |           |           |                        |                                                                                 |        |      |     |
| 5 wt.% Pt, 0.5 wt.% Fe                            | Al <sub>2</sub> O <sub>3</sub>        | dip-coating                                             | 15 - 20    | -              | Al <sub>2</sub> O <sub>3</sub> : 98<br>Pt: 4.9<br>Fe: 0.49 | honeycomb ceramic<br>400 cps                   | 50,8   | 25,4   | 25.7                 | 42.0           | 9.0             | 12.0             | 1           | 35 - 35.75     | 0.25 - 1.0     | 10000  | 2.0                     | 100<br>at inlet | 47       | 40        | 100       | 18,8                   |                                                                                 |        | [1]  |     |
| unknown, proprietary<br>Engelhard Selectra-PROX I | -                                     | -                                                       | -          | -              | -                                                          | honeycomb<br>cordierite, 600 cps               | 127    | 76,2   | 579                  | 38.4           | 19.9            | 16.8             | 0.2         | 24.7           |                | 18000  | 1.35                    |                 |          | 69        | 100       |                        |                                                                                 |        | [2]  |     |
| 0.5 wt.% Pt                                       | Al <sub>2</sub> O <sub>3</sub>        | -                                                       | -          | -              | -                                                          | cordierite<br>600 cps                          | -      | -      | -                    | 30.0           | 17.0            | 15.0             | 0.003 - 1.0 | balance        | 0.003 - 1.0    | -      | -                       | -               | -        | -         | -         | -                      | -                                                                               |        |      | [3] |
| 0.5 wt.% Pt                                       |                                       |                                                         |            |                |                                                            |                                                |        |        |                      |                |                 |                  |             |                |                | 10000  |                         | 170             | 99       | 50        | 100       | 50                     |                                                                                 |        |      |     |
| 0.5 wt.% Pd                                       | γ-Al <sub>2</sub> O <sub>3</sub>      | impregnation                                            | -          | -              | -                                                          | honeycomb cordierite<br>400 cps                | -      | -      | -                    | 40.0           | -               | 20.0             | 0.8         | 38.4           | 0,8            | 30000  | 2.0                     | 240-280         | 25       | 12        | 100       | 3                      |                                                                                 |        | [4]  |     |
| 0.5 wt.% Rh                                       |                                       |                                                         |            |                |                                                            |                                                |        |        |                      |                |                 |                  |             |                |                | 30000  |                         | 120-150         | 68       | 35        | 100       | 24                     |                                                                                 |        |      |     |
| 0.5 wt.% Ru                                       |                                       |                                                         |            |                |                                                            |                                                |        |        |                      |                |                 |                  |             |                |                | 30000  |                         | 130             | 52       | 27        | 100       | 14                     |                                                                                 |        |      |     |
| 0.1 wt.% Pt                                       | 12 % γ-Al <sub>2</sub> O <sub>3</sub> | dip-coating<br>slurry-sol-slurry                        | -          | -              | -                                                          | honeycomb metallic<br>Fe-20Cr-5Al<br>400 cps   | -      | -      | -                    | 39.6           | 19.8            | 16.5             | 1.0         | 22.1           | 1.0            | 10000  | 2.0                     | 198-206         | 96       | 47,5      | -         | 46                     |                                                                                 |        | [5]  |     |
| 4 wt.% Pt, 0.5 wt.% Fe,<br>Mordenite              | -                                     | dip-coating                                             | 14         |                | 100                                                        | honeycomb<br>cordierite, 400 cps               | 15     | 12     | 1.70                 | 63.0           | 20.0            | 15.0             | 1.0         | -              | 1.0            | 9500   | 2.0                     | 100-150         | 99,95    | 50        | 100       | 50,0                   |                                                                                 |        | [6]  |     |
| 15 mol.% Cu, 85 mol.% Ce                          |                                       |                                                         | -          | -              | -                                                          |                                                |        |        |                      |                |                 |                  |             |                |                |        |                         | 165-185         | 100      | 70        | 100       | 70,0                   |                                                                                 |        |      |     |
| 15 mol.% Cu, 8.5 mol.% Nd,<br>76.5 mol.% Ce       | Al <sub>2</sub> O <sub>3</sub>        | dip-coating                                             | -          | -              | -                                                          | honeycomb metallic<br>Fe-20Cr-5Al<br>400 cps   | 15     | 7      | 0.577                | 50.0           | 7.5             | 10.0             | 0.5         | 31.5           | 0.5            |        | 2.0                     | 165-205         | 100      | 70        |           | 70,0                   |                                                                                 |        | [7]  |     |
| 15 mol.% Cu, 8.5 mol.% Zr,<br>76.5 mol.% Ce       |                                       |                                                         | -          | -              | -                                                          |                                                |        |        |                      |                |                 |                  |             |                |                |        |                         | 165-205         | 100      | 75        |           | 75,0                   |                                                                                 |        |      |     |
| 4 wt.% Pt, 0.5 wt.% Fe,<br>Mordenite              | -                                     | dip-coating<br>alumina-sol<br>dip-coating<br>silica-sol | -          | -              | -                                                          | 100<br>honeycomb<br>cordierite, 400 cps        | 15     | 12     | 1.70                 | 73.0           | 20.0            | 5.0              | 1.0         | -              | 1.0            | 9500   | 2.0                     | 130             | 99.9     | -         | -         | 0.0                    | after 200 h<br>H <sub>2</sub> O-tolerance<br>durability test                    |        | [8]  |     |
| 2 wt.% Pt, Z-PM zeolith                           | -                                     | impregnation,<br>dip-coating                            | 50 - 75    | -              | 50                                                         | honeycomb<br>cordierite, 225 cps               | -      | -      | -                    | 97.5           | -               | -                | 1.0         | -              | 1.5            | 225000 | 3.0                     | 100-150<br>250  | 65<br>82 | >50<br>52 | -<br>-    | -<br>-                 | coating quantity<br>approximated                                                |        | [9]  |     |
| 1 wt.% Pt                                         | γ-Al <sub>2</sub> O <sub>3</sub>      | impregnation                                            | -          | 3.8            | -                                                          | macro-porous                                   | -      | -      | -                    | 50.0           | -               | -                | 1.0         | 48.0           | 1.0            | 20000  | 2.0                     | 225-250         | 99.6     | 42        | 100       | 41.8                   |                                                                                 |        | [10] |     |
| 1 wt.% Pt, 2 wt.% K                               | γ-Al <sub>2</sub> O <sub>3</sub>      |                                                         | -          | 3.0            | -                                                          | Al <sub>2</sub> O <sub>3</sub>                 |        |        |                      |                |                 |                  |             |                |                |        |                         | 200-250         | >99      | 42        | 100       | 41.6                   | molar ratio K/Pt = 10                                                           |        |      |     |
| 1 wt.% Pt, 1.5 wt.% Ni                            | γ-Al <sub>2</sub> O <sub>3</sub>      | impregnation                                            | -          | -              | -                                                          | macro-porous<br>Al <sub>2</sub> O <sub>3</sub> | -      | -      | -                    | 50.0           | 12.5            | 15.0             | 1.0         | 20.5           | 1.0            | 16000  | 2.0                     | 140-180         | >99      | 51        | -         | 51                     |                                                                                 |        | [11] |     |
| CuO-CeO <sub>2</sub> (6.8 wt.% Cu)                | -                                     | impregnation                                            | 9          | 4.5            | -                                                          | honeycomb<br>cordierite, 400 cps               | 21     | 9      | 1.34                 | 42.0           | 15.0            | 15.0             | 0.7         | He 26.6        | 0.7            | 9000   | 2.0                     | 135-158         | 100      | -         | -         | -                      | Cu/Ce-ratio=0.13                                                                |        | [12] |     |
| CuO-CeO <sub>2</sub> (8.6 wt.% Cu)                |                                       |                                                         | 12         | 4.4            | -                                                          |                                                |        |        |                      |                |                 |                  |             |                |                |        |                         | 128-144         | 100      | -         | -         | -                      | Cu/Ce-ratio=0.17                                                                |        |      |     |
| M1 Co-ZrO <sub>2</sub> (15.9 wt.% Co)             |                                       |                                                         | -          | -              | 41                                                         |                                                |        |        |                      |                |                 |                  |             |                |                |        |                         | 250-260         | 70       | -         | -         | -                      | slurry ZrO <sub>2</sub> , 10wt.%/HAc                                            |        |      |     |
| M2 Co-ZrO <sub>2</sub> (12.1 wt.% Co)             |                                       |                                                         | -          | -              | 35                                                         |                                                |        |        |                      |                |                 |                  |             |                |                |        |                         | -               | -        | -         | -         | -                      | slurry ZrO <sub>2</sub> , 10wt.%/H <sub>2</sub> O                               |        |      |     |
| M3 Co-ZrO <sub>2</sub> (11.1 wt.% Co)             |                                       |                                                         | -          | -              | 40                                                         |                                                |        |        |                      |                |                 |                  |             |                |                |        |                         | 250-260         | 85       | -         | -         | -                      | slurry ZrO <sub>2</sub> , 20wt.%/HAc                                            |        |      |     |
| M3* Co-ZrO <sub>2</sub> (21.5 wt.% Co)            |                                       |                                                         | -          | -              | 38                                                         |                                                |        |        |                      |                |                 |                  |             |                |                |        |                         | 240             | 90       | -         | -         | -                      | slurry ZrO <sub>2</sub> , 20wt.%/HAc                                            |        |      |     |
| M4 Co-ZrO <sub>2</sub> (10.6 wt.% Co)             | ZrO <sub>2</sub>                      | impregnation                                            | -          | -              | 76                                                         | honeycomb<br>cordierite, 400 cps               | 20     | 10x10  | 2.00                 | 40.0           | -               | -                | 1.0         | He 58.0        | 1.0            | -      | 2.0                     | 220-250         | >90      | -         | -         | -                      | slurry NYACOL(ZrO <sub>2</sub> ),<br>stability test 100h                        |        | [13] |     |
| M5 Co-ZrO <sub>2</sub> (10.6 wt.% Co)             |                                       |                                                         | -          | -              | 55                                                         |                                                |        |        |                      |                |                 |                  |             |                |                |        |                         | 240-260         | 85       | -         | -         | -                      | slurry ZrO <sub>2</sub> ,<br>20wt.%/NYACOL(ZrO <sub>2</sub> )                   |        |      |     |
| M6 Co-ZrO <sub>2</sub> (6.9 wt.% Co)              |                                       |                                                         | -          | -              | 66                                                         |                                                |        |        |                      |                |                 |                  |             |                |                |        |                         | -               | -        | -         | -         | -                      | slurry NYACOL(Al <sub>2</sub> O <sub>3</sub> )-<br>ZrO <sub>2</sub> 20 wt.%/HAc |        |      |     |
| C1 Co-CeO <sub>2</sub> (11.2 wt.% Co)             |                                       |                                                         | -          | -              | 23                                                         |                                                |        |        |                      |                |                 |                  |             |                |                |        |                         | 200-210         | 98       | -         | -         | -                      |                                                                                 |        |      |     |
| C2 Co-CeO <sub>2</sub> (10.1 wt.% Co)             | CeO <sub>2</sub>                      | impregnation                                            | -          | -              | 53                                                         | honeycomb<br>cordierite, 400 cps               | 20     | 10x10  | 2.00                 | 40.0           | -               | -                | 1.0         | He 58.0        | 1.0            | -      | 2.0                     | 200-210         | 95       | -         | -         | -                      | coating quantity<br>calculated                                                  |        | [14] |     |
| C3 Co-CeO <sub>2</sub> (10.0 wt.% Co)             |                                       |                                                         | -          | -              | 23                                                         |                                                |        |        |                      |                |                 |                  |             |                |                |        |                         | 200-210         | 98       | -         | -         | -                      |                                                                                 |        |      |     |
| 0.02 wt.% Pt, 4.5 wt.% CuO                        | CeO <sub>2</sub>                      | SFRD                                                    | -          | -              | -                                                          |                                                | -      | -      | -                    | 41.0           | -               | -                | 0.5         | 58.0           | 0.5            | -      | 2.0                     | 150             | >90      | -         | -         | -                      |                                                                                 |        | [15] |     |

| composition                                                                                | Washcoat carrier               | preparation/<br>coating method                    | monolith   |                |                                        | Feed [mol.%]                                       |        |        |                      |                |                 |                  |       |                       |                | GHSV [h <sup>-1</sup> ] | λ   | T [°C]        | X(CO) [%]  | S(CO) [%]    | X(O <sub>2</sub> ) [%] | Y(CO) [%]    | remark                                             | ref. |
|--------------------------------------------------------------------------------------------|--------------------------------|---------------------------------------------------|------------|----------------|----------------------------------------|----------------------------------------------------|--------|--------|----------------------|----------------|-----------------|------------------|-------|-----------------------|----------------|-------------------------|-----|---------------|------------|--------------|------------------------|--------------|----------------------------------------------------|------|
|                                                                                            |                                |                                                   | layer [μm] | pore size [nm] | coating quantity [mg/cm <sup>3</sup> ] | support                                            | l [mm] | D [mm] | V [cm <sup>3</sup> ] | H <sub>2</sub> | CO <sub>2</sub> | H <sub>2</sub> O | CO    | N <sub>2</sub>        | O <sub>2</sub> |                         |     |               |            |              |                        |              |                                                    |      |
| 0.01 wt.% Pt, 2.0 wt.% CuO                                                                 | CeO <sub>2</sub>               | SFRD                                              |            |                |                                        | α-Al <sub>2</sub> O <sub>3</sub> -<br>foam, 20 ppi |        |        |                      |                |                 |                  |       |                       |                |                         |     | 140-150       | >90        | -            | -                      | -            | SFRD supercritical<br>fluid reactive<br>deposition |      |
| 0.03 wt.% Pt, 5.8 wt.% CuO                                                                 | CeO <sub>2</sub>               | SFRD                                              |            |                |                                        |                                                    |        |        |                      |                |                 |                  |       |                       |                |                         |     |               | 90-150     | <60          | -                      | -            | -                                                  |      |
| 1.0 wt.% Au, 1.25 wt.% MgO                                                                 | Al <sub>2</sub> O <sub>3</sub> | homogenous<br>deposition-<br>precipitation (urea) | -          | -              | -                                      | honeycomb<br>cordierite                            | 20     | 11     | 1.90                 | 61.7           | -               | -                | 1.0   | He 36.3               | 1.0            | -                       | 3.2 | 90            | 60         | -            | -                      | -            | [16]                                               |      |
| Pt-promoted CuFe-catalyst*                                                                 | Al <sub>2</sub> O <sub>3</sub> | impregnation                                      | -          | -              | -                                      | honeycomb<br>cordierite, 400 cpsi                  | 76.2   | 19.1   | 21.7                 | 45.7           | 17.5            | 25.0             | 0.222 | 11.4                  | 0.222          | 24000                   | 2.0 | 70-150        | >96        | >50          | -                      | >48          | proprietary                                        | [17] |
| CuO <sub>x</sub> -CeO <sub>2</sub> (14 mol.% Cu,<br>86 mol.% Ce)                           | enamel                         | coprecipitation                                   | -          | 8              | 103                                    | enameled<br>steel monolith                         | 30     | 17     | 6.81                 | 50.0           | -               | -                | 1.0   | 48.0                  | 1.0            | 7000                    | 2.0 | 170-200       | >99        | -            | -                      | -            | [18]                                               |      |
| CuO <sub>x</sub> -CeO <sub>2</sub> (4.2 wt.% CuO)                                          | -                              | wet impregnation,<br>dip-coating                  | 12-15      | -              | 230                                    | honeycomb<br>cordierite, 900 cpsi                  | 12     | 16     | 2.41                 | 50.0           | -               | -                | 0.5   | 48.6<br>23.6          | 0.9            | -                       | 3.6 | 90-120<br>145 | >95<br>>90 | 30-60<br><30 | -                      | 30-60<br><30 | [19]                                               |      |
| 2 wt.% Au/TiO <sub>2</sub>                                                                 |                                | incipient wetness<br>impregnation                 |            |                | 23.0                                   | anodized Al-<br>monolith                           | 15     | 14     | 2.31                 |                |                 |                  |       | composition not given |                | 1040                    | 3.0 | 80-110        | 50         | <20          | -                      | <10          | [20]                                               |      |
| CuO <sub>x</sub> -CeO <sub>2</sub> (4.2 wt.% CuO), S1-M                                    |                                | wet impregnation,<br>dip-coating                  | 15         |                |                                        | honeycomb<br>cordierite, 400 cpsi                  | 12     | 16     | 2.41                 | 50.0           | -               | -                | 0.5   | 23.6                  | 0.9            |                         | 3.6 | 140-200       | >99        | 28-62        | -                      | 28-80        |                                                    |      |
| CuO <sub>x</sub> -CeO <sub>2</sub> (4.2 wt.% CuO), S2-M                                    |                                | wet impregnation,<br>dip-coating                  | 15         |                |                                        | honeycomb<br>cordierite, 400 cpsi                  | 12     | 16     | 2.41                 | 50.0           | -               | -                | 0.5   | 23.6                  | 0.9            |                         | 3.6 | 160-180       | >99        | 33-48        | -                      | 28-80        |                                                    |      |
| CuO <sub>x</sub> -CeO <sub>2</sub> (4.2 wt.% CuO), S3-M                                    |                                | wet impregnation,<br>dip-coating                  | 15         |                |                                        | honeycomb<br>cordierite, 400 cpsi                  | 12     | 16     | 2.41                 | 50.0           | -               | -                | 0.5   | 23.6                  | 0.9            |                         | 3.6 | 140-200       | >99        | 28-78        | -                      | 28-80        | [21]                                               |      |
| CuO <sub>x</sub> -CeO <sub>2</sub> (4.2 wt.% CuO), S5-M                                    |                                | wet impregnation,<br>dip-coating                  | 15         |                |                                        | honeycomb<br>cordierite, 400 cpsi                  | 12     | 16     | 2.41                 | 50.0           | -               | -                | 0.5   | 23.6                  | 0.9            |                         | 3.6 | 130-200       | >99        | 28-87        | -                      | 28-80        |                                                    |      |
| CuO <sub>x</sub> -CeO <sub>2</sub> (4.2 wt.% CuO), S6-M                                    |                                | wet impregnation,<br>dip-coating                  | 15         |                |                                        | honeycomb<br>cordierite, 400 cpsi                  | 12     | 16     | 2.41                 | 50.0           | -               | -                | 0.5   | 23.6                  | 0.9            |                         | 3.6 | 200           | 98         | 31           | -                      | 28-80        |                                                    |      |
| CuO (4.8 wt.% Cu)                                                                          | CeO <sub>2</sub>               | wet impregnation,<br>dip-coating                  |            |                | 28.9                                   | 3d-printed resin                                   | 10     | 15     | 1.77                 | 30.0           | -               | -                | 2.0   | He 66.0               | 2.0            | 2000                    | 2.0 | 135           | 95         | 90           | -                      | 86           | 10 h experiment                                    | [22] |
| CuO-CeO <sub>2</sub> /celite<br>(CuO 4.6 wt.%, CeO <sub>2</sub> 18.7 wt.%,<br>Cu/Ce=0.55)  |                                | co-impregnation,<br>dip-coating                   | 20-30      |                | 46                                     |                                                    |        |        |                      |                |                 |                  |       |                       |                |                         |     | 150-185       | >98        |              |                        |              |                                                    |      |
| CuO-CeO <sub>2</sub> /aerosil<br>(CuO 4.9 wt.%, CeO <sub>2</sub> 18.9 wt.%,<br>Cu/Ce=0.55) |                                | co-impregnation,<br>dip-coating                   | 20-30      |                | 47                                     | honeycomb<br>cordierite, 400 cpsi                  | 10     | 10x10  | 1.0                  |                |                 |                  |       |                       |                |                         |     | 185           | 91         |              |                        |              | [23]                                               |      |
| CuO-CeO <sub>2</sub> /SBA-15<br>(CuO 4.9 wt.%, CeO <sub>2</sub> 19.1 wt.%,<br>Cu/Ce=0.55)  |                                | co-impregnation,<br>dip-coating                   | 20-30      |                | 48                                     |                                                    |        |        |                      |                |                 |                  |       |                       |                |                         |     | 185           | 85         |              |                        |              |                                                    |      |

## References Supplementary Table1 Monoliths overview

- [1] G.W. Roberts, P. Chin, X. Sun, J.J. Spivey, Preferential oxidation of carbon monoxide with Pt/Fe monolithic catalysts: Interactions between external transport and the reverse water-gas-shift reaction, *Appl. Catal., B*, 46 (2003) 601-611. <http://dx.doi.org/10.1016/j.apcatb.2003.07.002>.
- [2] R.K. Ahluwalia, Q. Zhang, D.J. Chmielewski, K.C. Lauze, M.A. Inbody, Performance of CO preferential oxidation reactor with noble-metal catalyst coated on ceramic monolith for on-board fuel processing applications, *Catal. Today*, 99 (2005) 271-283. <http://dx.doi.org/10.1016/j.cattod.2004.10.015>.
- [3] E.J. Bissett, S.H. Oh, R.M. Sinkevitch, Pt surface kinetics for a PrOx reactor for fuel cell feedstream processing, *Chem. Eng. Sci.*, 60 (2005) 4709-4721. <http://dx.doi.org/10.1016/j.ces.2005.02.069>.
- [4] S. Zhou, Z. Yuan, S. Wang, Selective CO oxidation with real methanol reformat over monolithic Pt group catalysts: PEMFC applications, *Int. J. Hydrog. Energy*, 31 (2006) 924-933. <http://dx.doi.org/10.1016/j.ijhydene.2005.07.014>.
- [5] J. Zhang, J. Jia, C. Zhang, S. Wang, Preparation of Pt/Al<sub>2</sub>O<sub>3</sub> Metallic Honeycomb Catalyst and Its Catalytic Properties for CO Preferential Oxidation, *Chin. J. Catal.*, 29 (2008) 421-425. <https://www.cjccatal.com/EN/Y2008/V29/I5/421>.
- [6] N. Maeda, T. Matsushima, H. Uchida, H. Yamashita, M. Watanabe, Performance of Pt-Fe/mordenite monolithic catalysts for preferential oxidation of carbon monoxide in a reformat gas for PEFCs, *Appl. Catal., A*, 341 (2008) 93-97. <http://dx.doi.org/10.1016/j.apcata.2008.02.022>.
- [7] S.H. Zeng, Y. Liu, Nd- or Zr-modified CuO-CeO<sub>2</sub>/Al<sub>2</sub>O<sub>3</sub>/FeCrAl monolithic catalysts for preferential oxidation of carbon monoxide in hydrogen-rich gases, *Appl. Surf. Sci.*, 254 (2008) 4879-4885. <http://dx.doi.org/10.1016/j.apsusc.2008.01.168>.
- [8] N. Maeda, T. Matsushima, M. Kotobuki, T. Miyao, H. Uchida, H. Yamashita, M. Watanabe, H<sub>2</sub>O-tolerant monolithic catalysts for preferential oxidation of carbon monoxide in the presence of hydrogen, *Appl. Catal., A*, 370 (2009) 50-53. <http://dx.doi.org/10.1016/j.apcata.2009.09.010>.
- [9] G. Neri, G. Rizzo, F. Corigliano, I. Arrigo, M. Capri, L. De Luca, V. Modafferi, A. Donato, A novel Pt/zeolite-based honeycomb catalyst for selective CO oxidation in a H<sub>2</sub>-rich mixture, *Catal. Today*, 147 (2009) S210-S214. <http://dx.doi.org/10.1016/j.cattod.2009.07.049>.
- [10] Y. Zhang, C.Y. Zhao, H. Liang, Y. Liu, Macroporous monolithic Pt/ $\gamma$ -Al<sub>2</sub>O<sub>3</sub> and K-Pt/ $\gamma$ -Al<sub>2</sub>O<sub>3</sub> catalysts used for preferential oxidation of CO, *Catal. Lett.*, 127 (2009) 339-347. <http://dx.doi.org/10.1007/s10562-008-9686-z>.
- [11] S. Lu, Y. Liu, Y. Wang, Meso-macro-porous monolithic Pt-Ni/Al<sub>2</sub>O<sub>3</sub> catalysts used for miniaturizing preferential carbon monoxide oxidation reactor, *Chem. Commun.*, 46 (2010) 634-636. <http://dx.doi.org/10.1039/b912769k>.
- [12] J.L. Ayastuy, N.K. Gamboa, M.P. González-Marcos, M.A. Gutiérrez-Ortiz, CuO/CeO<sub>2</sub> washcoated ceramic monoliths for CO-PROX reaction, *Chem. Eng. J.*, 171 (2011) 224-231. <http://dx.doi.org/10.1016/j.cej.2011.03.006>.
- [13] L.E. Gómez, I.S. Tiscornia, A.V. Boix, E.E. Miró, Co/ZrO<sub>2</sub> catalysts coated on cordierite monoliths for CO preferential oxidation, *Appl. Catal., A*, 401 (2011) 124-133. <http://dx.doi.org/10.1016/j.apcata.2011.05.007>.
- [14] L.E. Gómez, I.S. Tiscornia, A.V. Boix, E.E. Miró, CO preferential oxidation on cordierite monoliths coated with Co/CeO<sub>2</sub> catalysts, *Int. J. Hydrog. Energy*, 37 (2012) 14812-14819. <http://dx.doi.org/10.1016/j.ijhydene.2012.01.159>.
- [15] S. Lang, M. Türk, B. Kraushaar-Czarnetzki, Novel PtCuO/CeO<sub>2</sub>/ $\alpha$ -Al<sub>2</sub>O<sub>3</sub> sponge catalysts for the preferential oxidation of CO (PROX) prepared by means of supercritical fluid reactive deposition (SFRD), *J. Catal.*, 286 (2012) 78-87. <http://dx.doi.org/10.1016/j.jcat.2011.10.017>.
- [16] S. Özdemir, Z.I. Önsan, R. Yildirim, Selective CO oxidation over monolithic Au-MgO/Al<sub>2</sub>O<sub>3</sub> catalysts, *J. Chem. Technol. Biotechnol.*, 87 (2012) 58-64. <http://dx.doi.org/10.1002/jctb.2682>.
- [17] Q. Zhang, L. Shore, R.J. Farrauto, Selective CO oxidation over a commercial PROX monolith catalyst for hydrogen fuel cell applications, *Int. J. Hydrog. Energy*, 37 (2012) 10874-10880. <http://dx.doi.org/10.1016/j.ijhydene.2012.04.032>.
- [18] M.I. Domínguez, A. Pérez, M.A. Centeno, J.A. Odriozola, Metallic structured catalysts: Influence of the substrate on the catalytic activity, *Appl. Catal., A*, 478 (2014) 45-57. <http://dx.doi.org/10.1016/j.apcata.2014.03.028>.

- [19] P.S. Barbato, A. Di Benedetto, G. Landi, L. Lisi, CuO/CeO<sub>2</sub> based monoliths for CO preferential oxidation in H<sub>2</sub>-rich streams, *Chem. Eng. J.*, 279 (2015) 983-993. <https://dx.doi.org/10.1016/j.cej.2015.05.079>.
- [20] E. Adrover, D. Boldrini, N.J. Divins, A. Casanovas, G. Tonetto, E. López, J. Llorca, Study of Cu-Zn and Au/TiO<sub>2</sub> catalysts on anodized aluminum monoliths for hydrogen generation and purification, *Int. J. Chem. Reactor Eng.*, 14 (2016) 831-842. <http://dx.doi.org/10.1515/ijcre-2015-0119>.
- [21] G. Landi, Barbato, Paola Sabrina, A. Di Benedetto, L. Lisi, Optimization of the preparation method of CuO/CeO<sub>2</sub> structured catalytic monolith for CO preferential oxidation in H<sub>2</sub>-rich streams, *Appl. Catal., B*, 181 (2016) 727-737. <https://dx.doi.org/10.1016/j.apcatb.2015.08.040>.
- [22] C.Y. Chaparro-Garnica, A. Davó-Quiñero, E. Bailón-García, D. Lozano-Castelló, A. Bueno-López, Design of Monolithic Supports by 3D Printing for Its Application in the Preferential Oxidation of CO (CO-PrOx), *ACS Applied Materials & Interfaces*, 11 (2019) 36763-36773. <http://dx.doi.org/10.1021/acsami.9b12731>.
- [23] I.S. Tiscornia, A.M. Lacoste, L.E. Gómez, A.V. Boix, CuO–CeO<sub>2</sub>/SiO<sub>2</sub> coating on ceramic monolith: Effect of the nature of the catalyst support on CO preferential oxidation in a H<sub>2</sub>-rich stream, *Int. J. Hydrog. Energy*, 45 (2020) 6636-6650. <http://dx.doi.org/10.1016/j.ijhydene.2019.12.126>.
